# Supplementary material for: An ultrasensitive flow cytometric immunoassay based on bead surface-initiated template-free DNA extension
Source: Royal Society of Chemistry journal article supplement (doi:10.1039/c8sc02752h), 2018-01-01
Supplement: c8sc02752h1.pdf [file c8sc02752h1.pdf]

## Electronic Supplementary Information

### **An Ultrasensitive Flow Cytometric Immunoassay Based on Bead Surface-Initiated Template-Free DNA Extension**

*Liping Zhu, Desheng Chen, Xiaohui Lu, Yan Qi, Pan He, Chenghui Liu,\* Zhengping Li*

Key Laboratory of Analytical Chemistry for Life Science of Shaanxi Province; Key Laboratory of Applied Surface and Colloid Chemistry, Ministry of Education; School of Chemistry and Chemical Engineering, Shaanxi Normal University, Xi'an 710119, Shaanxi Province, P. R. China

Corresponding author: Prof. Dr. Chenghui Liu

Email: liuch@snnu.edu.cn (C. Liu)

Phone/Fax: +86 29 81530859

#### **List of Contents**

1. Synthesis and characterization of the 16 nm AuNPs
2. Optimization of the amount of TdT
3. Optimization of the ratio of mAb2 and ODN on the AuNPs
4. Generality evaluation of the TdT-FCI for the detection of different antigens
5. Comparison of different analytical methods for PSA detection

## 1. Synthesis and characterization of the 16 nm AuNPs

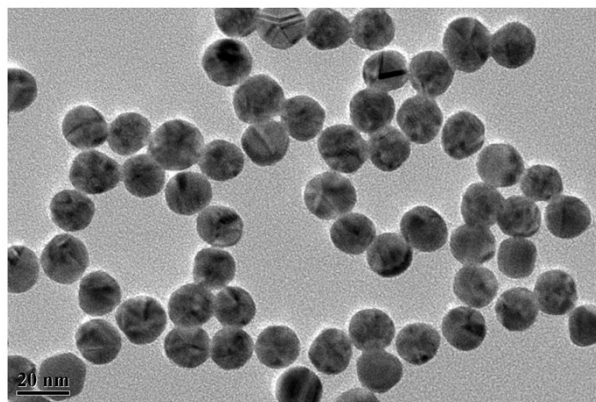

**Fig. S1.** The representative TEM image of the prepared AuNPs.

The gold nanoparticles (AuNPs) were prepared following the well-established protocol.<sup>S1</sup> Briefly, all glassware was firstly cleaned in the freshly prepared  $\text{K}_2\text{Cr}_2\text{O}_7\text{-H}_2\text{SO}_4$  (3:1) solution, thoroughly rinsed with ultrapure water, and then dried prior to use. 100 mL of  $\text{HAuCl}_4$  solution (0.01%) was boiled under vigorous stirring. Then, 2 mL of 1% trisodium citrate solution was pipetted into the boiling solution quickly, and kept boiling for 15 min under stirring. Along with the formation of AuNPs, the solution color changed from pale yellow to brilliant red. After cooled down to room temperature, the colloidal AuNPs was stored at 4 °C. The as-prepared AuNPs were characterized on a JEM-2100 high resolution transmission electron microscopy (HR-TEM, JEOL). The HR-TEM image of AuNPs (Fig. S1) reveals a highly monodispersed AuNPs with an average diameter of ~16 nm.

## 2. Optimization of the amount of TdT

To achieve the best analytical performance of the proposed method, the effect of TdT dosage was investigated by varying the TdT from 0.2 U to 10 U. As shown in Fig. S2a, the PSA-aroused fluorescence intensity of the MBs increases sharply when TdT increases from 0.2 U to 10 U. Meanwhile, the fluorescence responses of the blank control (without PSA) also show an increasing tendency along with the increase of TdT dosage. In this study, the highest S/B ratio produced by PSA to that of the blank control is obtained at 1.0 U of TdT (Fig. S2b). Taking into consideration of relatively low background and high PSA-produced signal to realize better discrimination of the target

from the blank, 1.0 U of TdT is selected for PSA analysis in this work.

It should be noted that if 1.0 U TdT is used for PSA analysis, the blank control shows a relatively high signal under the FL1 voltage of 465 V for FCM measurement (as shown in image (III) of Fig. S2a). So, when evaluating the analytical performance of the proposed TdT-FCI under the optimized experimental conditions (Fig. 4 in the main text), the FL1 Voltage for the FCM analysis was rationally lowered down to 420 V to ensure a low blank signal and a wider dynamic range for PSA analysis.

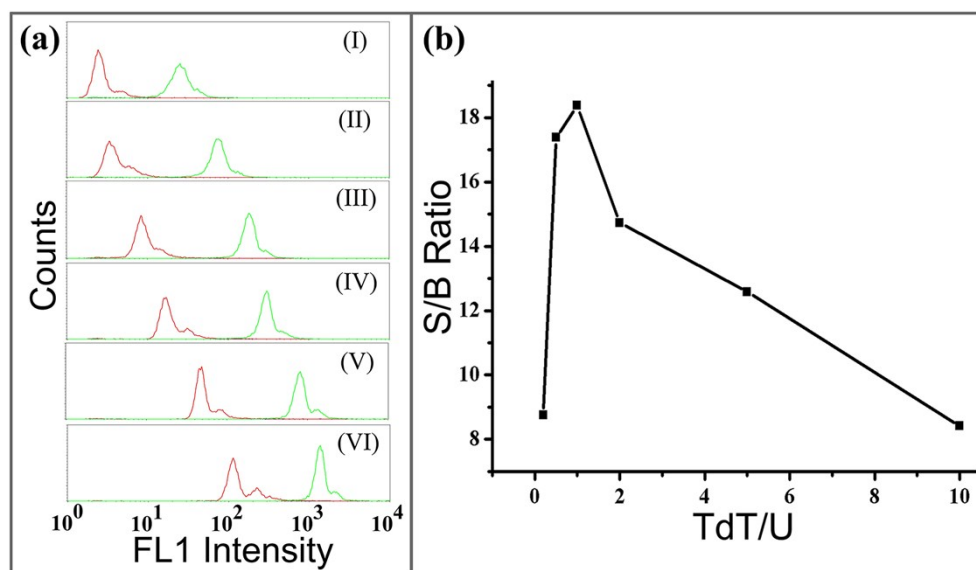

**Fig. S2.** Optimization of TdT dosage for the detection of PSA. (a) Fluorescence histograms of the MBs incubated with 1 ng/mL PSA (green) in comparison with those of blank control (without PSA, red) in the presence of varying dosage of TdT. (I) 0.2 U; (II) 0.5 U; (III) 1 U; (IV) 2 U; (V) 5 U; (VI) 10 U. (b) The corresponding S/B ratio under different TdT concentrations. S/B ratio refers to the ratio of 1 ng/mL PSA-aroused MFI value to that of blank control. The other experimental conditions: dTTP, 1 mM; FL1 Voltage in the FCM measurement, 465 V.

### 3. Optimization of the ratio of mAb2 and ODN on the AuNPs

In the proposed TdT-FCI strategy, the ratio of mAb2 to ODN on the AuNPs is a very important factor that may influence the sensitivity of the immunoassay. In this case, according to the standard bioconjugation procedures, different amounts of mAb2 (0.2  $\mu$ g~50  $\mu$ g) was firstly loaded on the AuNPs (1 mL of the as-prepared colloidal AuNPs), and then 1 nmol of excess ODN was added to prepare the mAb2-AuNPs-ODN. As indicated from Fig. S3, the fluorescence signals of the MBs produced by the

same concentration of PSA (500 pg/mL) keep almost stable with the increase of mAb2 dosage from 0.2  $\mu\text{g/mL}$  to 10  $\mu\text{g/mL}$ , and then show a gradually decreasing tendency from 10  $\mu\text{g/mL}$  to 50  $\mu\text{g/mL}$ . This is probably because if too much mAb2 are firstly immobilized on the AuNPs, the capacity of the AuNPs for loading ODN will be inevitably decreased, which will obviously lower the efficiency of the TdT-catalyzed signal amplification. It should be noted that the signals of the blank without PSA almost keep constant irrespective of the variation of mAb2 amount. In consideration of both low detection limit of target PSA and high stability of the immunoreaction, 10  $\mu\text{g/mL}$  mAb2 is selected for the preparation of mAb2-AuNPs-ODN conjugates in this work.

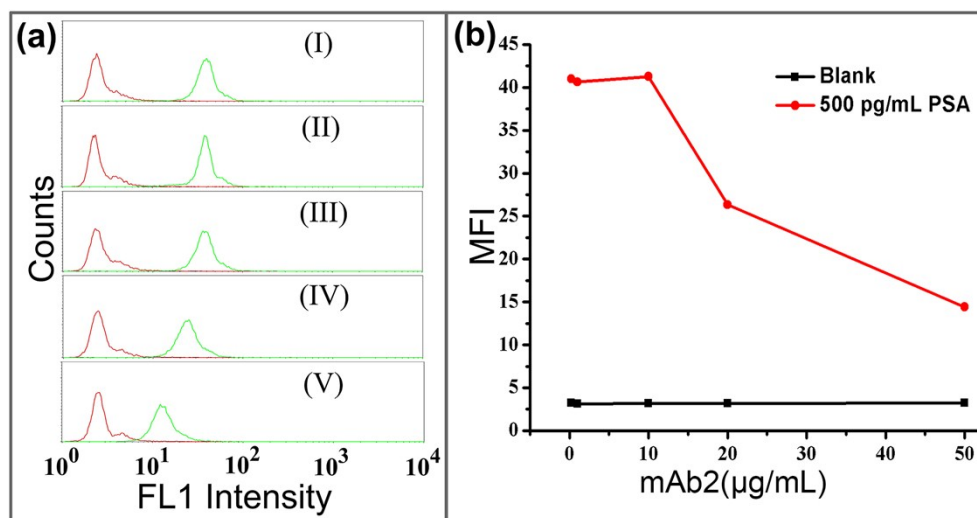

**Fig. S3.** Optimization of the ratio of mAb2/ODN on the AuNPs for the detection of PSA. (a) Fluorescence histograms of the MBs incubated with 500 pg/mL PSA (green) in comparison with those of blank control (red) in the presence of different mAb2 dosages (the amount of ODN is fixed at 1 nmol in the preparation of mAb2-AuNPs-ODN). The concentrations of mAb2: (I) 0.2  $\mu\text{g/mL}$ ; (II) 1  $\mu\text{g/mL}$ ; (III) 10  $\mu\text{g/mL}$ ; (IV) 20  $\mu\text{g/mL}$ ; (V) 50  $\mu\text{g/mL}$ . (b) The corresponding S/B ratios with different mAb2 concentrations. S/B ratio refers to the ratio of the 500 pg/mL PSA-produced MFI value to that of blank control. The other experimental conditions: dTTP, 1 mM; TdT, 1 U; FL1 Voltage in the FCM measurement, 420 V.

#### 4. Generality evaluation of the TdT-FCI for the detection of different antigens

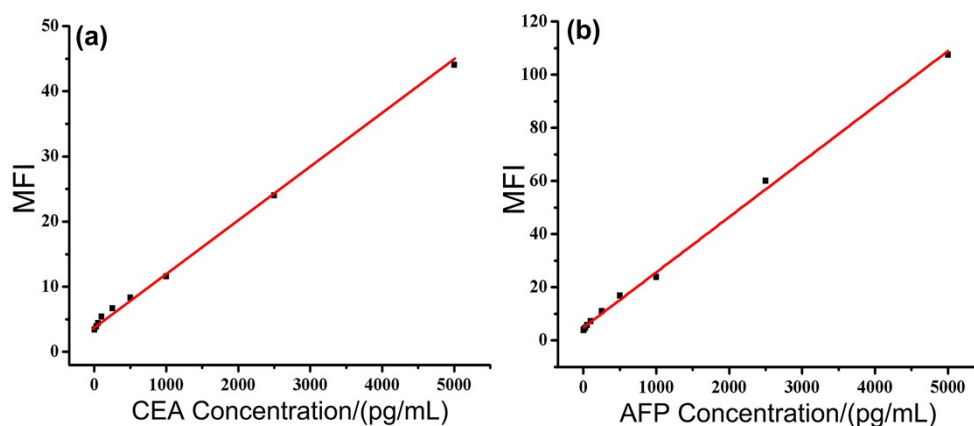

**Fig. S4.** (a) The relationship between the MFI values and CEA concentrations. (b) The relationship between the MFI values and AFP concentrations.

For the detection of CEA, the anti-CEA mAb1-conjugated MBs, and anti-CEA mAb2/ODN co-functionalized AuNPs were employed and the assay was conducted following the same procedures as those for PSA analysis using M-270 MBs as the reaction carrier. As shown in Fig. S4a, the MFI values are linearly proportional to the concentration of CEA in the range from 5 pg/mL to 5 ng/mL. The corresponding calibration equation is  $MFI = 0.008C_{CEA}(\text{pg/mL}) + 4.038$  with a regression coefficient  $R$  of 0.9988. Following the same way, Fig. S4b exhibits the plot between the MFI values and AFP concentrations. The MFI values of the fluorescent MBs are linearly proportional to the concentration of AFP in the range from 5 pg/mL to 5 ng/mL. The correlation equation is  $MFI = 0.021C_{AFP}(\text{pg/mL}) + 4.782$  with a correlation coefficient ( $R$ ) of 0.9976. Therefore, one can see that by simply altering the target-specific antibodies, the proposed TdT-FCI possesses good generality to detect different protein targets. It is worth noting that the detection limits of PSA and CEA seem relatively higher than that of PSA, which should be possibly ascribed to the much larger molecular weight of AFP and CEA than PSA, as well as the affinity differences for the target-mediated immunoreactions.

## 5. Comparison of different analytical methods for PSA detection

**Table S1.** Comparison between the proposed TdT-FCI with other analytical methods for the detection of PSA.

| Detection Strategy                                                                            | Signal Readout             | Detection Limit of PSA | References |
|-----------------------------------------------------------------------------------------------|----------------------------|------------------------|------------|
| AuNPs-based proximity immunoassay coupled with RNase H-based signal amplification             | Fluorescence               | 1.25 pg/mL             | S2         |
| Bead-based immunoassay coupled with capillary-driven microfluidic chips                       | Fluorescence               | 3.6 pg/mL              | S3         |
| QD-based immunosensing/FRET                                                                   | Luminescence               | 80 pg/mL               | S4         |
| Persistent luminescence nanoparticles-based FRET assay                                        | Luminescence               | 90 pg/mL               | S5         |
| MBs-based enzyme-mediated reverse colorimetric immunoassay                                    | Colorimetry                | 30 pg/mL               | S6         |
| 1,4-Benzenediboronic-acid-induced AuNPs aggregation                                           | Colorimetry                | 4 ng/mL                | S7         |
| Glucose oxidase-catalyzed growth of AuNPs                                                     | Colorimetry                | ~3.1 fg/mL             | S8         |
| Lanthanide-doped nanoprobes/Time resolved photoluminescence                                   | Fluorescence               | 0.52 pg/mL             | S9         |
| Commercial dissociation-enhanced lanthanide fluoroimmunoassay (DELFA) kit                     | Fluorescence               | 0.1 ng/mL              | S10        |
| MBs-supported immuno-PCR                                                                      | Fluorescence               | ~3 pg/mL               | S11        |
| PSA aptamer coupled with guanine-based chemiluminescent biosensing                            | Chemiluminescence          | 1 ng/mL                | S12        |
| SERS nanotags                                                                                 | SERS                       | 12-150 pg/mL           | S13        |
| SERS nanoprobes/Area-scanning method                                                          | SERS                       | 0.11 pg/mL             | S14        |
| Phospholipid bilayer coated AuNPs label                                                       | MS                         | 30 pg/mL               | S15        |
| Isotope tagging strategy                                                                      | ICP-MS                     | 240 pg/mL              | S16        |
| CQDs/g-C <sub>3</sub> N <sub>4</sub> nanoheterostructures-based sensing platform coupled with | Photoelectrochemical (PEC) | 5 pg/mL                | S17        |

|                                                                                                                                           |                                         |            |           |
|-------------------------------------------------------------------------------------------------------------------------------------------|-----------------------------------------|------------|-----------|
| copper nanoclusters-assembled PSA aptamer                                                                                                 |                                         |            |           |
| RCA-synthesized nanoenzyme for the signal amplification                                                                                   | PEC                                     | 0.32 pg/mL | S18       |
| Au nanocrystal decorated specific crystal facets BiVO <sub>4</sub> photoanode                                                             | PEC                                     | 4 pg/mL    | S19       |
| Enzymatic oxydate-triggered self-illuminated sensing platform                                                                             | PEC                                     | 3 pg/mL    | S20       |
| Aptasensor based on a hairbrush-like gold nanostructure                                                                                   | Electrochemical                         | 50 pg/mL   | S21       |
| Aptasensor based on GQDs-AuNRs modified screen-printed electrodes                                                                         | Electrochemical                         | 140 pg/mL  | S22       |
| DNA hybridization chain reaction (HCR) for signal amplification.                                                                          | Electrochemical                         | 0.17 pg/mL | S23       |
| Coupling dielectrophoretic biomarker enrichment in nano-slit channel                                                                      | Electrochemical                         | 1-5 pg/mL  | S24       |
| Gold nanorods (AuNRs) and magnetic nanoparticles-based digital immunoassay                                                                | AuNRs Counting by dark field microscope | 8 fg/mL    | S25       |
| A “signal-on” biosensor with positively charged gold nanoparticles as signal enhancer                                                     | Electrochemical                         | 0.06 pg/mL | S26       |
| A CeO <sub>2</sub> -matrical enhancing sensing platform based on the Bi <sub>2</sub> S <sub>3</sub> -labeled inverted quenching mechanism | Electrochemiluminescence (ECL)          | 0.3 pg/mL  | S27       |
| Fluorescent immunosensor based on CuS nanoparticles                                                                                       | Fluorescence                            | 0.1 pg/mL  | S28       |
| TdT-FCI                                                                                                                                   | Fluorescence/flow cytometry             | 0.5 pg/mL  | This work |

## References

**S1** G. Frens, *Nat. Phys. Sci.*, 1973, **241**, 20-22.

**S2** J. Xu, M. Shi, W. Chen, Y. Huang, L. Fang, L. Yao, S. Zhao, Z.-F. Chen and H. Liang, *Chem.*

*Commun.*, 2018, **54**, 2719-2722.

**S3** Y. Temiz, M. Lim and E. Delamarche, *Proc. SPIE.*, 2016, **9705**, 97050Z.

**S4** S. Bhuckory, L. Mattera, K. D. Wegner, X. Qiu, Y.-T. Wu, L. J. Charbonnière, P. Reiss and N. Hildebrandt, *Chem. Commun.*, 2016, **52**, 14423-14425.

**S5** B.-Y. Wu and X.-P. Yan, *Chem. Commun.*, 2015, **51**, 3903-3906.

**S6** Z. Gao, M. Xu, L. Hou, G. Chen and D. Tang, *Anal. Chem.*, 2013, **85**, 6945-6952.

**S7** Y.-C. Yang and W.-L. Tseng, *Anal. Chem.*, 2016, **88**, 5355-5362.

**S8** D. Liu, J. Yang, H.-F. Wang, Z. Wang, X. Huang, Z. Wang, G. Niu, A. R. Hight Walker and X. Chen, *Anal. Chem.*, 2014, **86**, 5800-5806.

**S9** J. Xu, S. Zhou, D. Tu, W. Zheng, P. Huang, R. Li, Z. Chen, M. Huang and X. Chen, *Chem. Sci.*, 2016, **7**, 2572-2578.

**S10** K. Järås, B. Adler, A. Tojo, J. Malm, G. Marko-Varga, H. Lilja and T. Laurell, *Clin. Chim. Acta*, 2012, **414**, 76-84.

**S11** X. Jiang, S. Cheng, W. Chen, L. Wang, F. Shi and C. Zhu, *Anal. Biochem.*, 2012, **424**, 1-7.

**S12** T. Cha, S. Cho, Y. T. Kim and J. H. Lee, *Biosens. Bioelectron.*, 2014, **61**, 31-37.

**S13** Z. Cheng, N. Choi, R. Wang, S. Lee, K. C. Moon, S.-Y. Yoon, L. Chen and J. Choo, *ACS Nano*, 2017, **11**, 4926-4933.

**S14** H. Chang, H. Kang, E. Ko, B.-H. Jun, H. Y. Lee, Y.-S. Lee and D. H. Jeong, *ACS Sens.*, 2016, **1**, 645-649.

**S15** X.-C. Lin, X.-N. Wang, L. Liu, Q. Wen, R.-Q. Yu and J.-H. Jiang, *Anal. Chem.*, 2016, **88**, 9881-9884.

**S16** G. Sun, B. Huang, Y. Zhang, Y. Zhang, Z. Xing, S. Zhang and X. Zhang, *Chem. Commun.*, 2017, **53**, 13075-13078.

**S17** S. Lv, Y. Li, K. Zhang, Z. Lin and D. Tang, *ACS Appl. Mater. Interfaces*, 2017, **9**, 38336-38343.

**S18** J. Zhuang, D. Tang, W. Lai, M. Xu and D. Tang, *Anal. Chem.*, 2015, **87**, 9473-9480.

**S19** J. Shu, Z. Qiu, Z. Lin, G. Cai, H. Yang and D. Tang, *Anal. Chem.*, 2016, **88**, 12539-12546.

**S20** J. Shu, Z. Qiu, Q. Zhou, Y. Lin, M. Lu and D. Tang, *Anal. Chem.*, 2016, **88**, 2958-2966.

**S21** N. Sattarahmady, A. Rahi and H. Heli, *Sci. Rep.*, 2017, **7**, 11238.



- S22** M. Srivastava, N. R. Nirala<sup>1</sup>, S. K. Srivastava and R. Prakash, *Sci. Rep.*, 2018, **8**, 1923.
- S23** J. Guo, J. Wang, J. Zhao, Z. Guo and Y. Zhang, *ACS Appl. Mater. Interfaces*, 2016, **8**, 6898-6904.
- S24** B. J. Sanghavi, W. Varhue, A. Rohani, K.-T. Liao, L. A. L. Bazydlo, C.-F. Chou and N. S. Swami, *Lab Chip*, 2015, **15**, 4563-4570.
- S25** L. Zhu, G. Li, S. Sun, H. Tan and Y. He, *RSC Adv.*, 2017, **7**, 27595-27602.
- S26** D. Wang, Y. Zheng, Y. Chai, Y. Yuan and R. Yuan, *Chem. Commun.*, 2015, **51**, 10521-10523.
- S27** Y. Zhao, Q. Wang, J. Li, H. Ma, Y. Zhang, D. Wu, B. Du and Q. Wei, *J. Mater. Chem. B*, 2016, **4**, 2963-2971.
- S28** Y.-D. Zhu, J. Peng, L.-P. Jiang and J.-J. Zhu, *Analyst*, 2014, **139**, 649-655.
